# Supplementary material for: Cucurbitacins from the Leaves of Citrullus colocynthis (L.) Schrad
Source: PubMed Central journal article supplement (PMC6332406; doi:10.3390/molecules201018001), 2015-09-30
Supplement: molecules-20-18001-s001.pdf [file molecules-20-18001-s001.pdf]

## Supplementary Materials

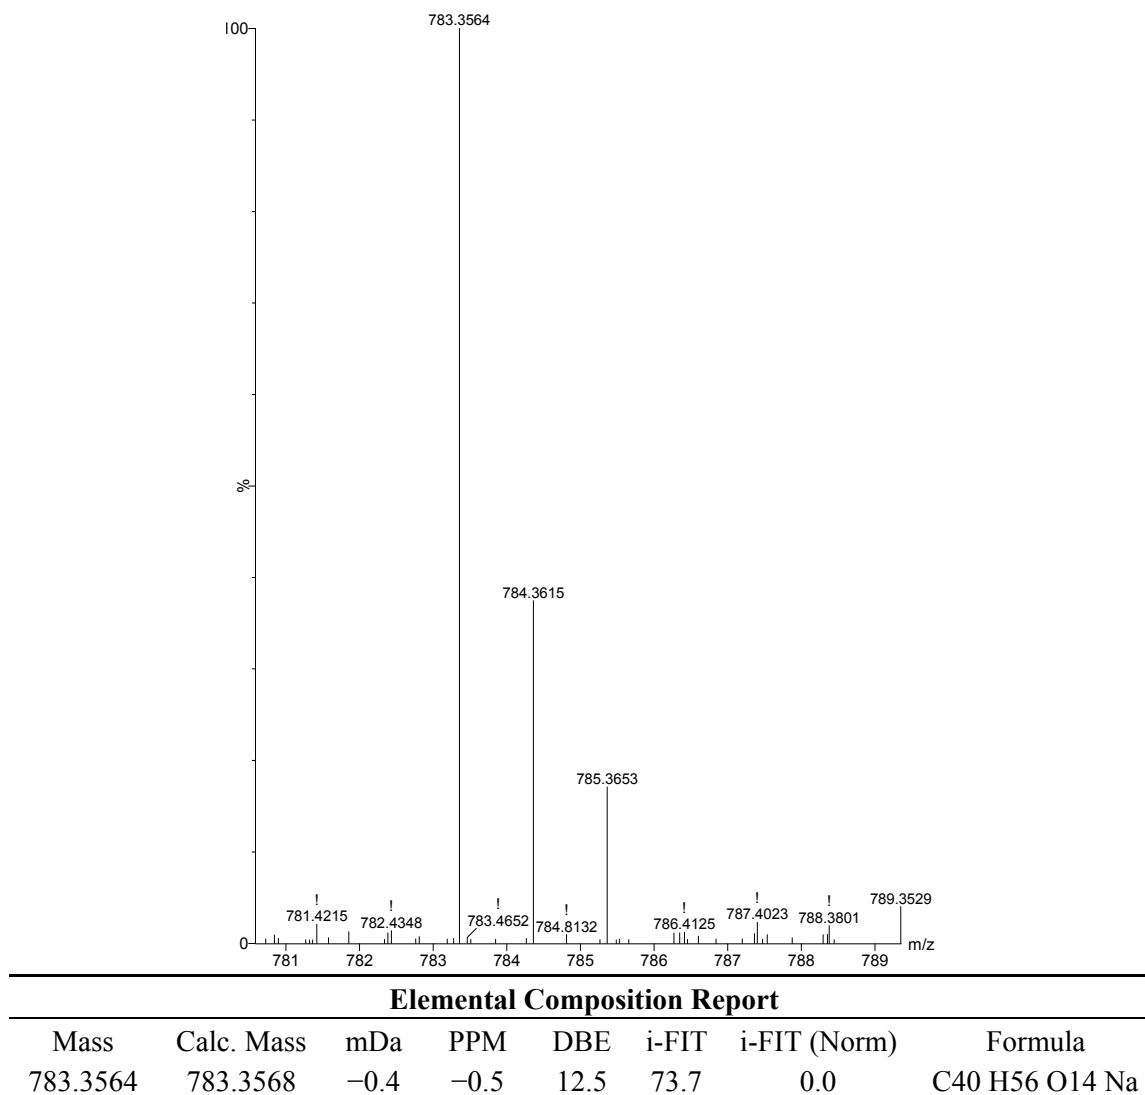

**Figure S1.** HR-ESI(+)MS spectrum of 6'-acetyl-2-O- $\beta$ -D-glucocucurbitacin E (**1**) obtained by direct infusion of a methanolic solution (100  $\mu$ g/mL). Elemental composition report was given by MassLynx V4.1 software.

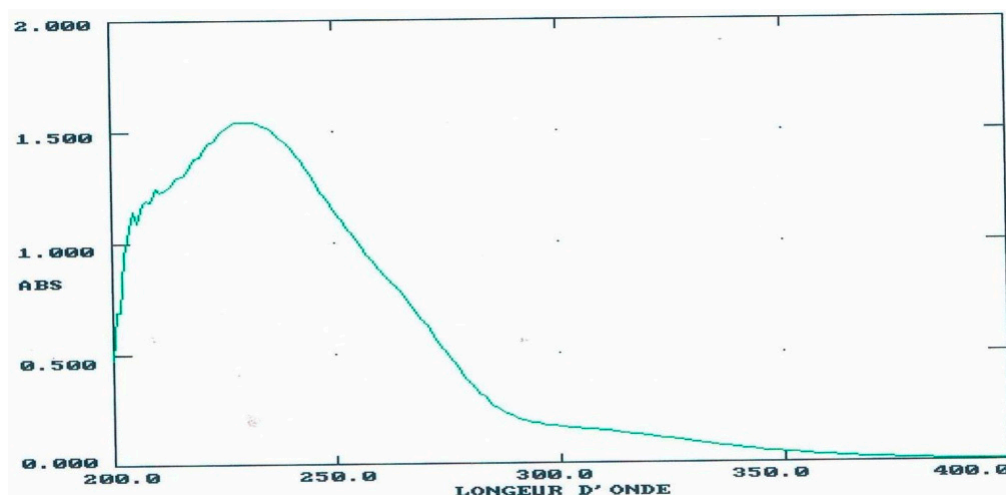

**Figure S2.** UV spectrum of 6'-acetyl-2-O- $\beta$ -D-glucocucurbitacin E (**1**) in MeOH.

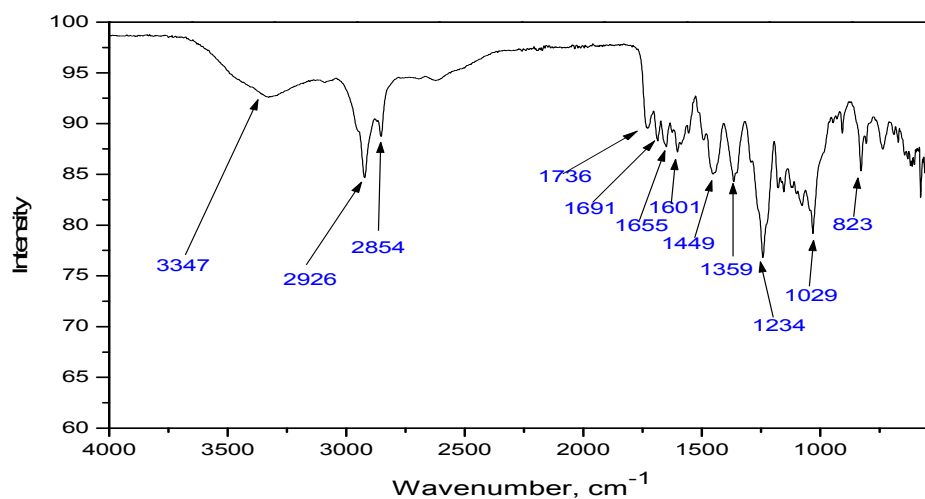

**Figure S3.** IR spectrum of 6'-acetyl-2-*O*- $\beta$ -D-glucocucurbitacin E (**1**) recorded on a Perkin-Elmer 100 FT-IR spectrometer.

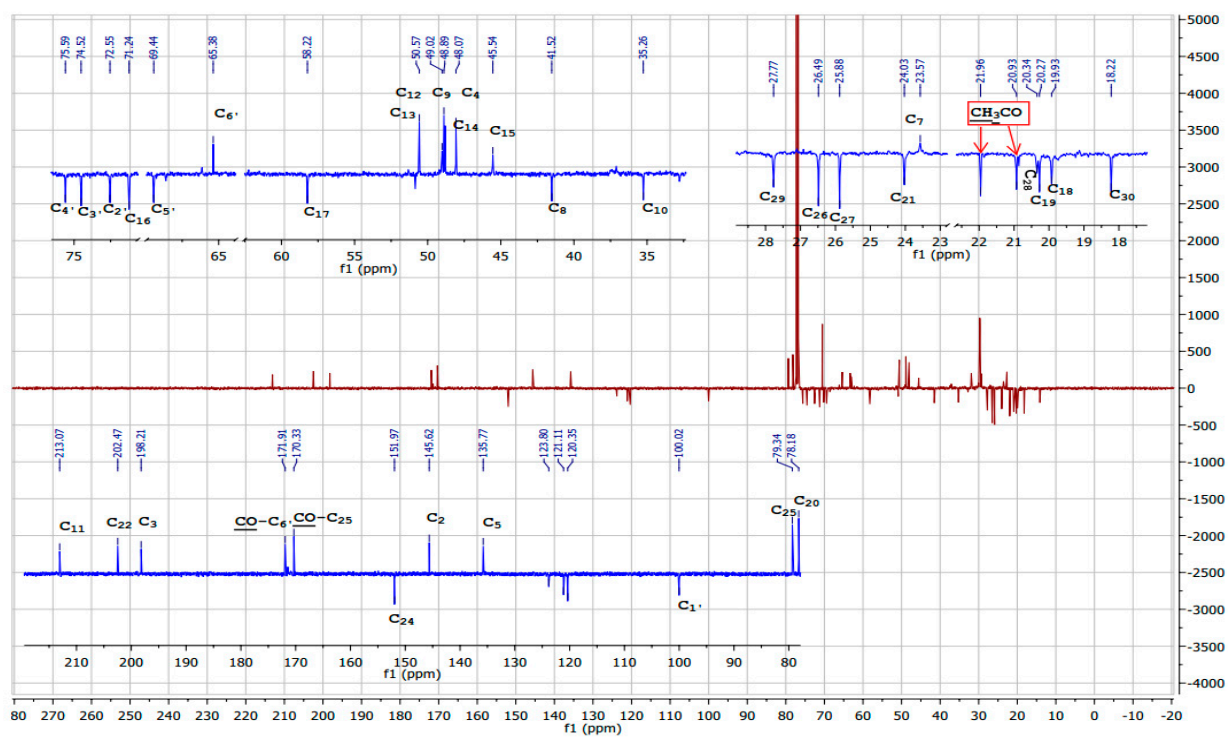

**Figure S4.**  $^{13}\text{C}$ -NMR spectrum of 6'-acetyl-2-*O*- $\beta$ -D-glucocucurbitacin E (**1**) at 125 MHz in  $\text{CDCl}_3$ .

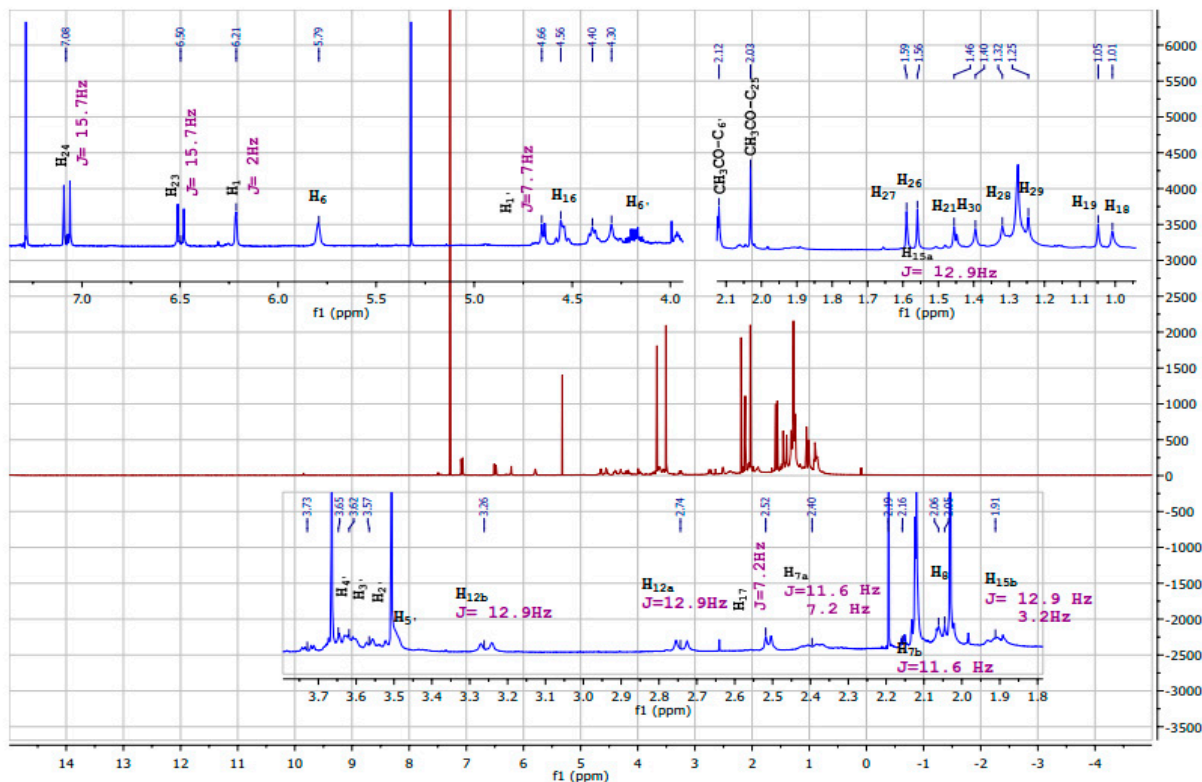

**Figure S5.**  $^1\text{H-NMR}$  spectrum of 6'-acetyl-2-*O*- $\beta$ -D-glucocucurbitacin E (**1**) at 500 MHz in  $\text{CDCl}_3$ .

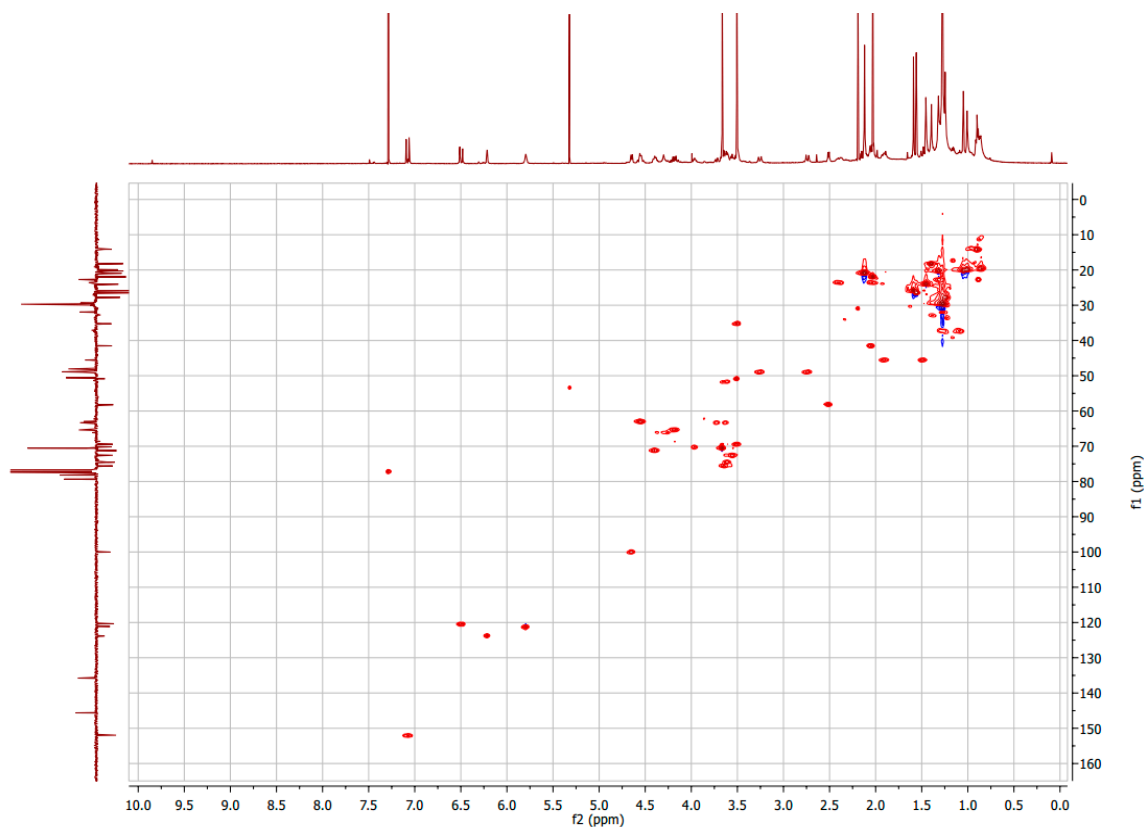

**Figure S6.** HMBC NMR spectrum of 6'-acetyl-2-*O*- $\beta$ -D-glucocucurbitacin E (**1**) at 500/125 MHz spectrum in  $\text{CDCl}_3$ .

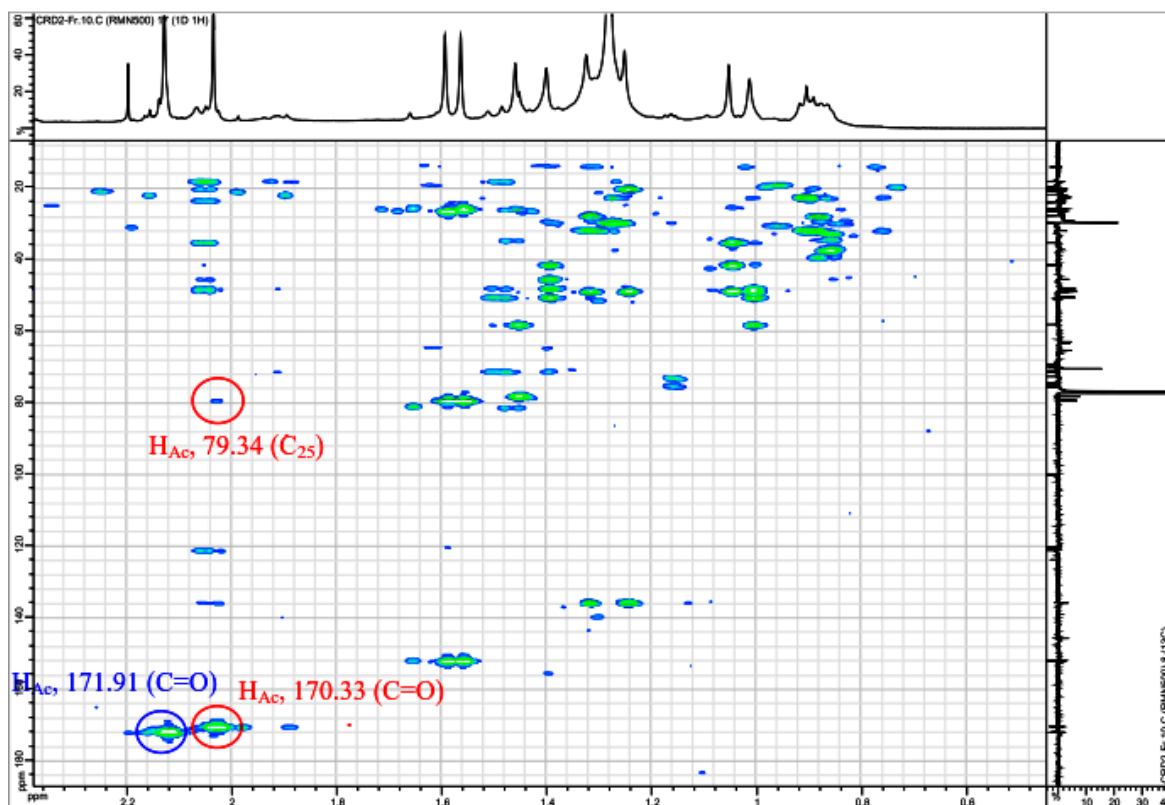

**Figure S7.** HMBC NMR spectrum of 6'-acetyl-2-*O*- $\beta$ -D-glucocucurbitacin E (**1**) at 500/125 MHz spectrum in CDCl<sub>3</sub> (Expansion).

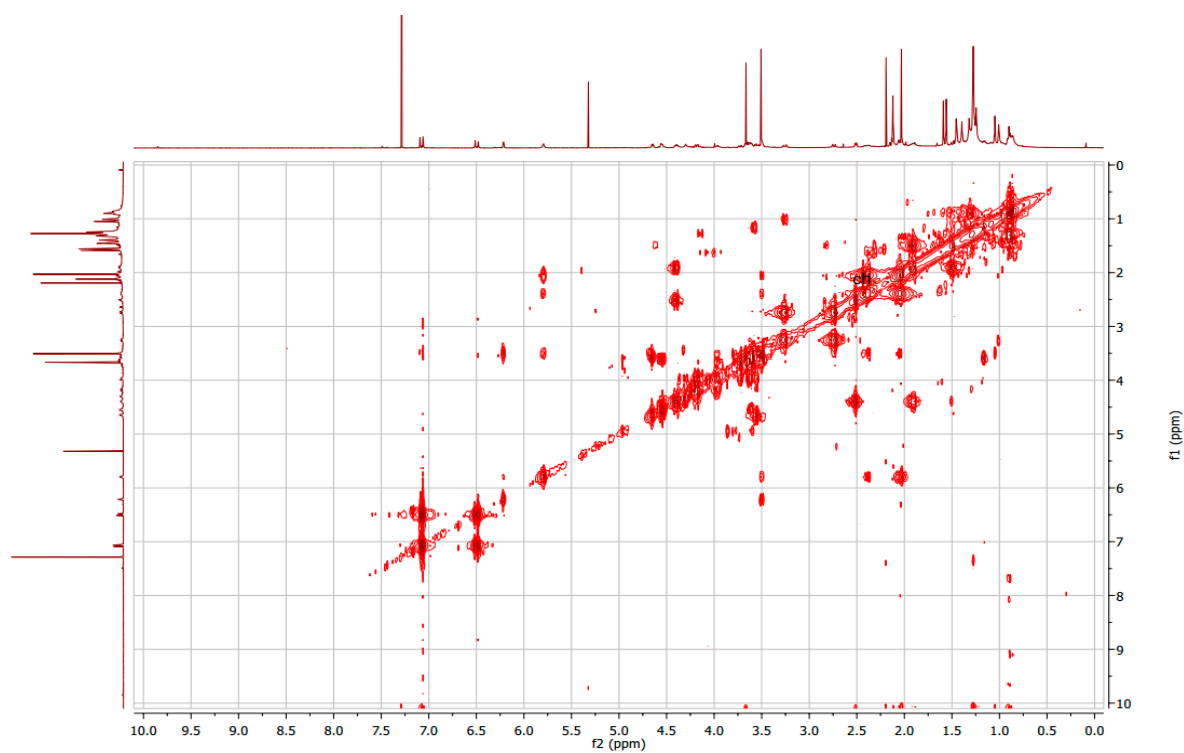

**Figure S8.** HSQC NMR spectrum of 6'-acetyl-2-*O*- $\beta$ -D-glucocucurbitacin E (**1**) at 500/125 MHz in CDCl<sub>3</sub>.

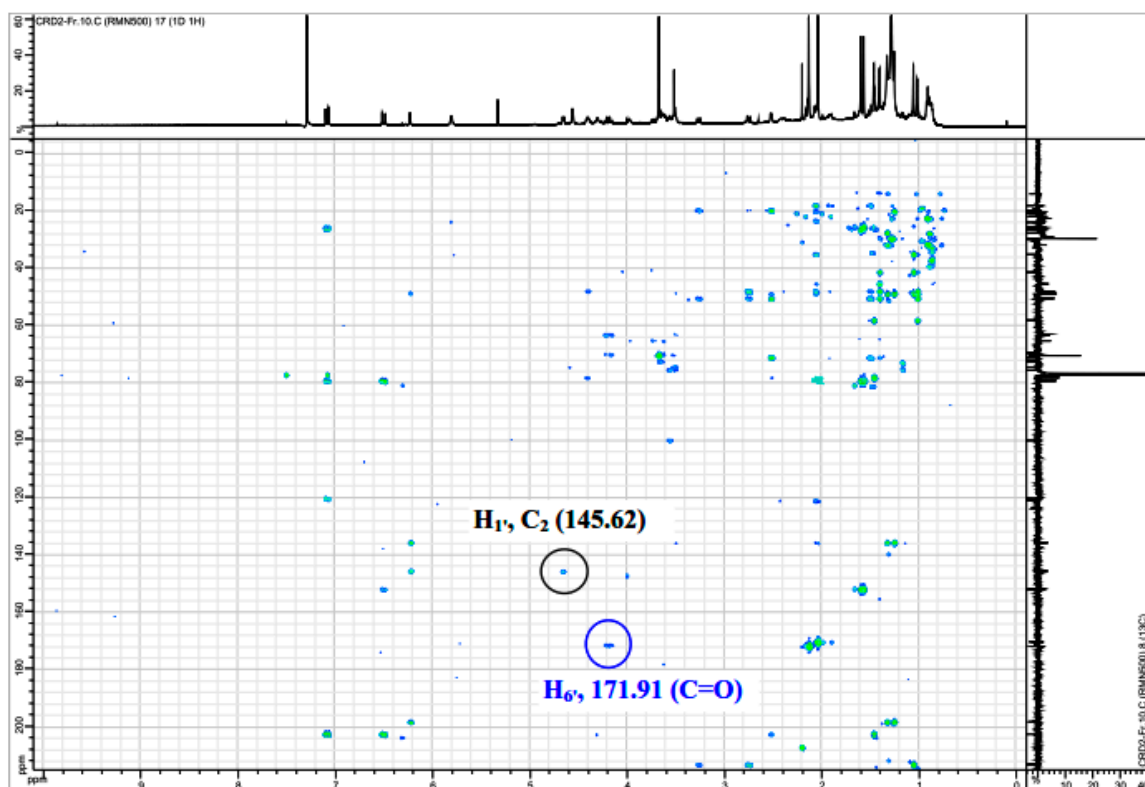

**Figure S9.**  $^1\text{H}$ - $^1\text{H}$  COSY NMR spectrum of 6'-acetyl-2-*O*- $\beta$ -D-glucocucurbitacin E (**1**) at 500 MHz in  $\text{CDCl}_3$ .

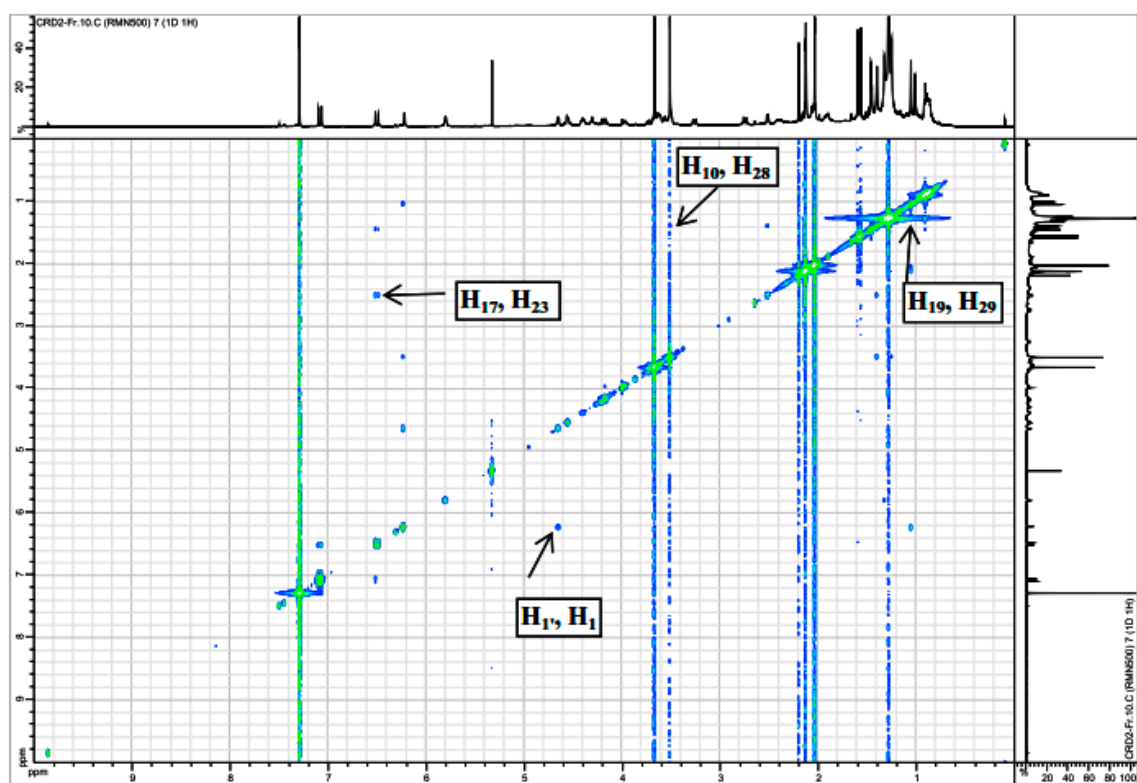

**Figure S10.**  $^1\text{H}$ - $^1\text{H}$  NOESY NMR spectrum of 6'-acetyl-2-*O*- $\beta$ -D-glucocucurbitacin E (**1**) at 500 MHz in  $\text{CDCl}_3$ .

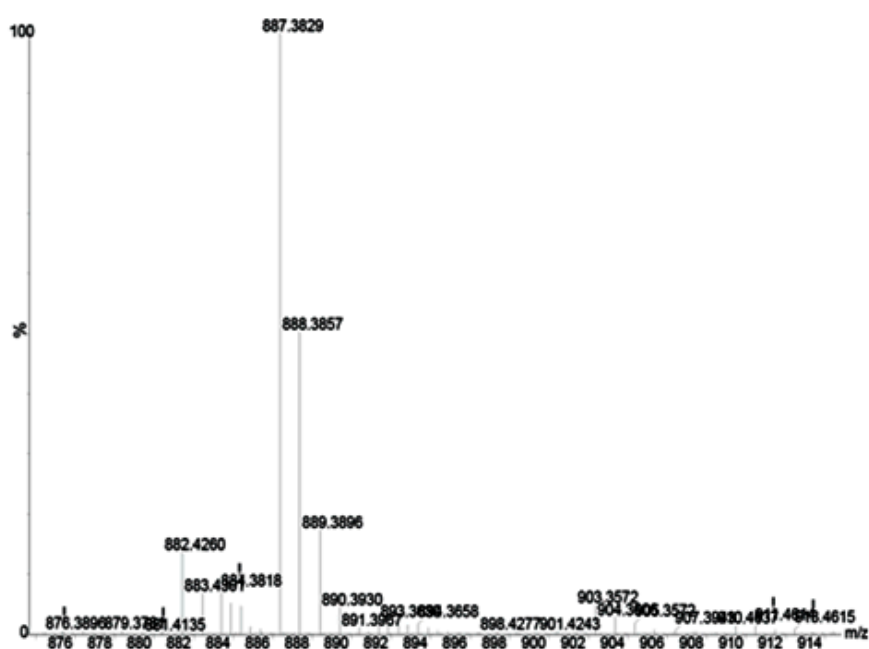

#### Elemental Composition Report

| Mass     | Calc. Mass | mDa  | PPM  | DBE  | i-FIT | i-FIT (Norm) | Formula        |
|----------|------------|------|------|------|-------|--------------|----------------|
| 887.3829 | 887.3830   | -0.1 | -0.1 | 17.5 | 132.4 | 0.9          | C47 H60 O15 Na |

**Figure S11.** HR-ESI(+)-MS spectrum of 25-*p*-coumaroyl-3'-acetyl-2-*O*- $\beta$ -D-glucocucurbitacin I (**2**) obtained by direct infusion of a methanolic solution (100  $\mu$ g/mL). Spectrum shows the *m/z* 741.3453 ion highlighting the neutral loss of the *p*-coumaroyl moiety. Elemental composition report was given by MassLynx V4.1 software.

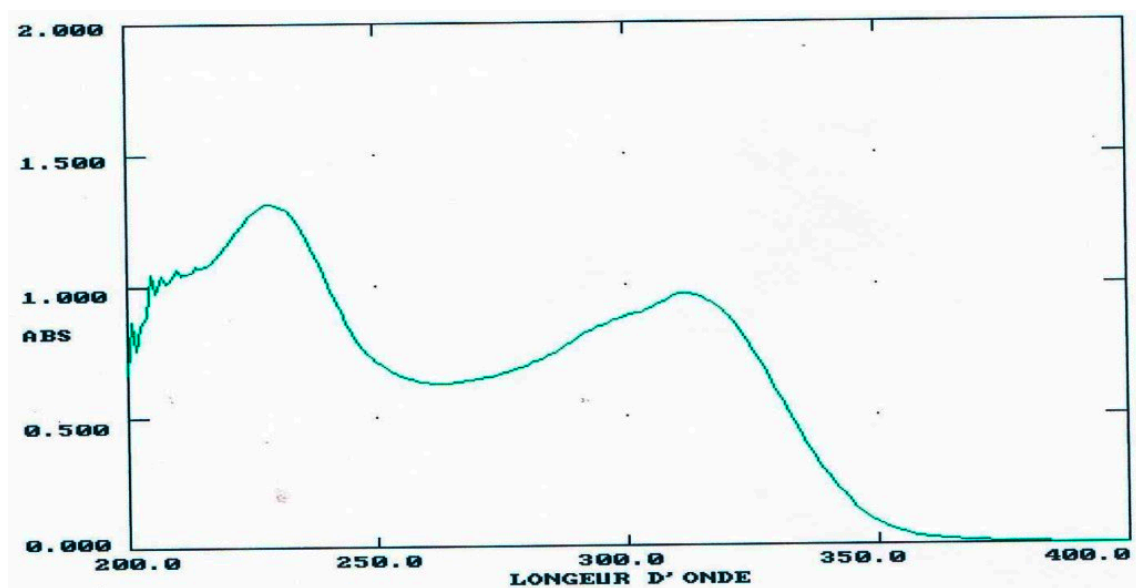

**Figure S12.** UV spectrum of 25-*p*-coumaroyl-3'-acetyl-2-*O*- $\beta$ -D-glucocucurbitacin I (**2**) in MeOH.

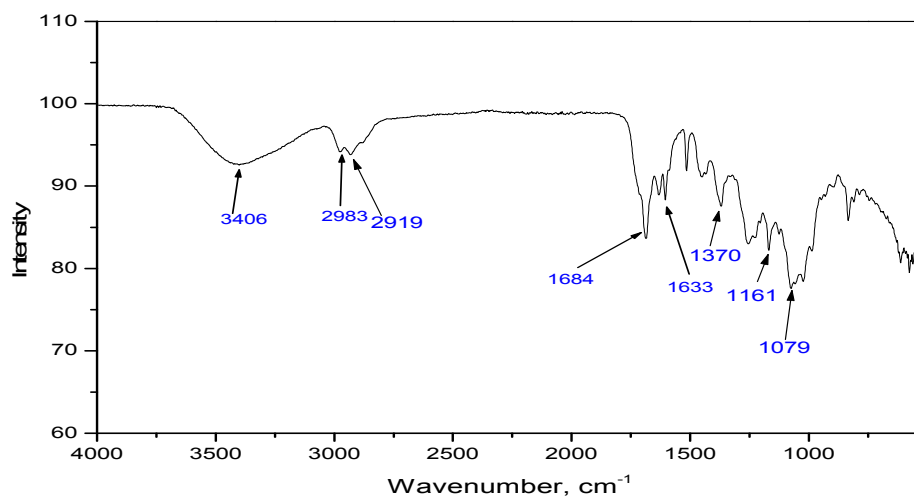

**Figure S13.** IR spectrum of 25-*p*-coumaroyl-3'-acetyl-2-*O*- $\beta$ -D-glucocucurbitacin I (**2**) recorded on a Perkin-Elmer 100 FT-IR spectrometer.

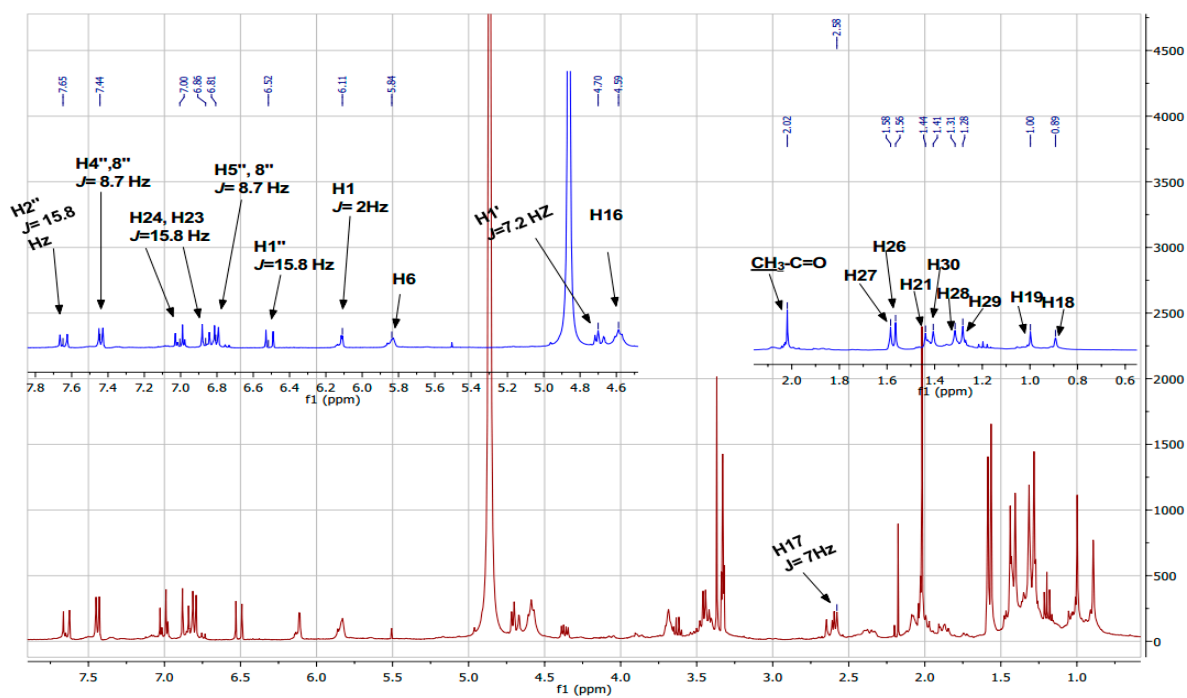

**Figure S14.**  $^1\text{H}$ -NMR spectrum of 25-*p*-coumaroyl-3'-acetyl-2-*O*- $\beta$ -D-glucocucurbitacin I (**2**) at 400 MHz in  $\text{CD}_3\text{OD}$ .

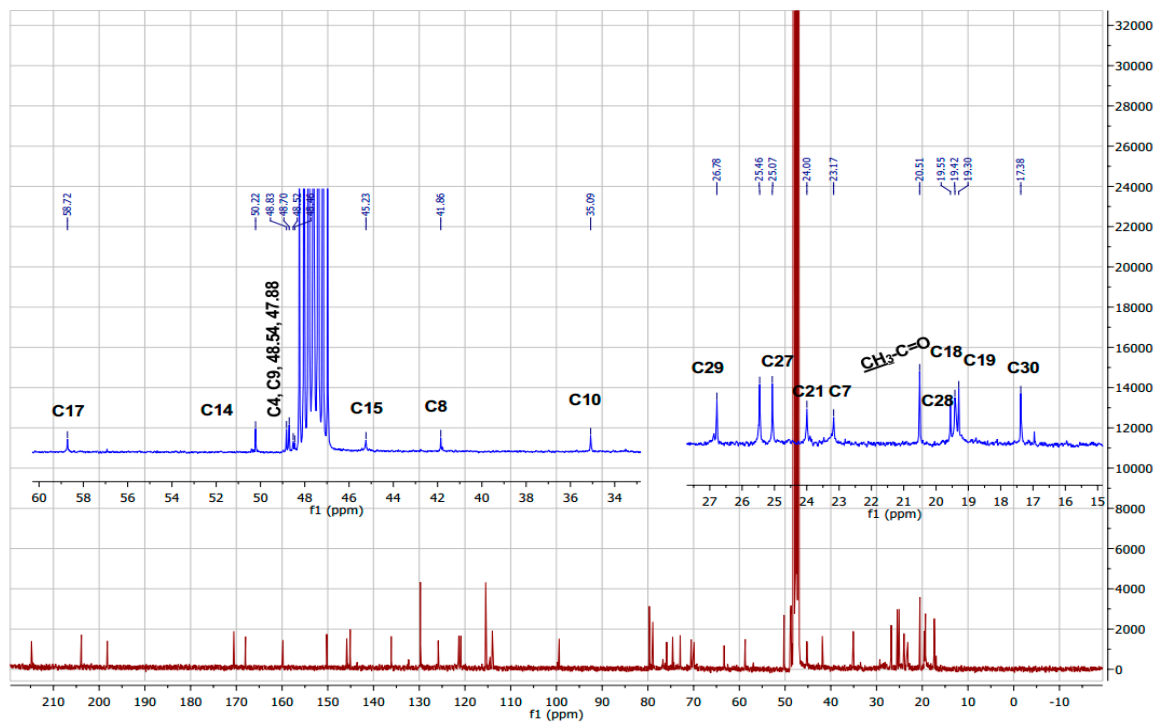

**Figure S15.**  $^{13}\text{C}$ -NMR spectrum of 25-*p*-coumaroyl-3'-acetyl-2-*O*- $\beta$ -D-glucocucurbitacin I (**2**) at 100 MHz in  $\text{CD}_3\text{OD}$ .

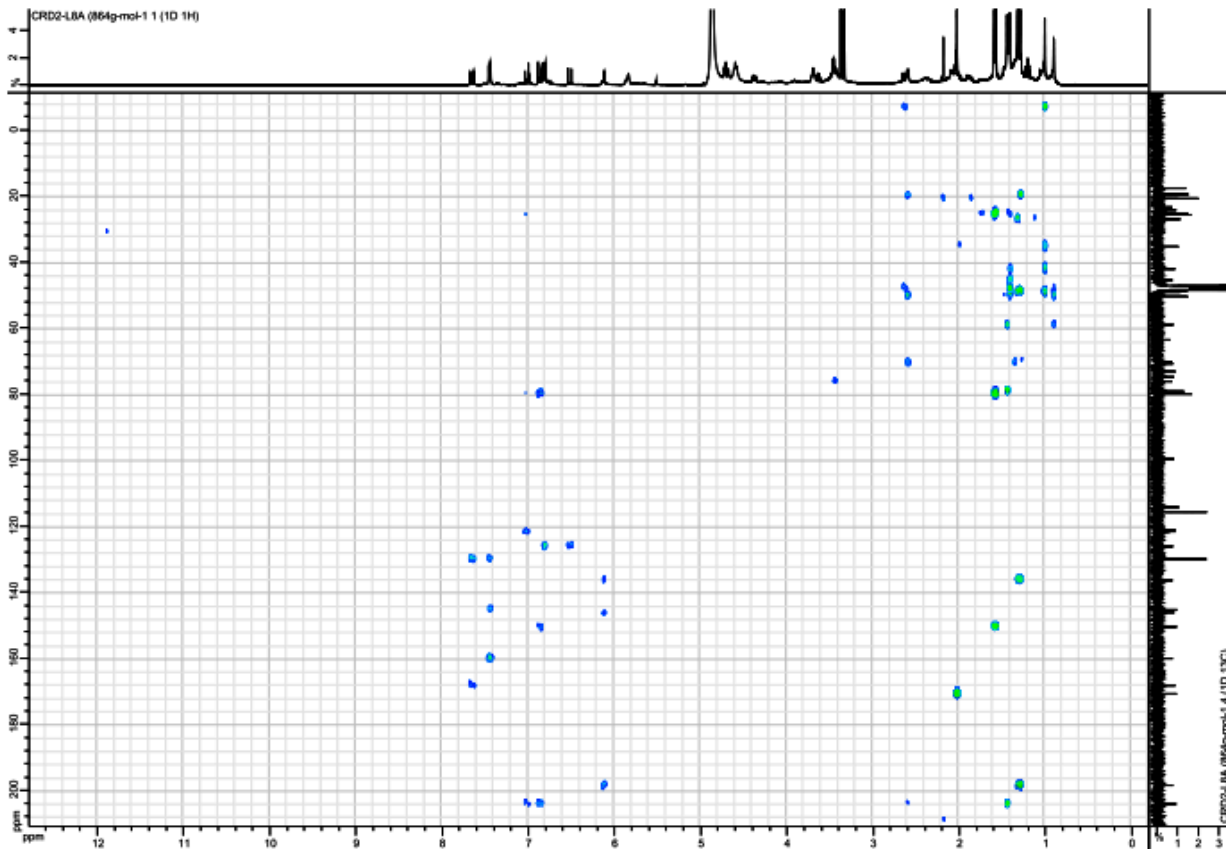

**Figure S16.** HMBC NMR spectrum of 25-*p*-coumaroyl-3'-acetyl-2-*O*- $\beta$ -D-glucocucurbitacin I (**2**) at 400/100 MHz in  $\text{CD}_3\text{OD}$ .



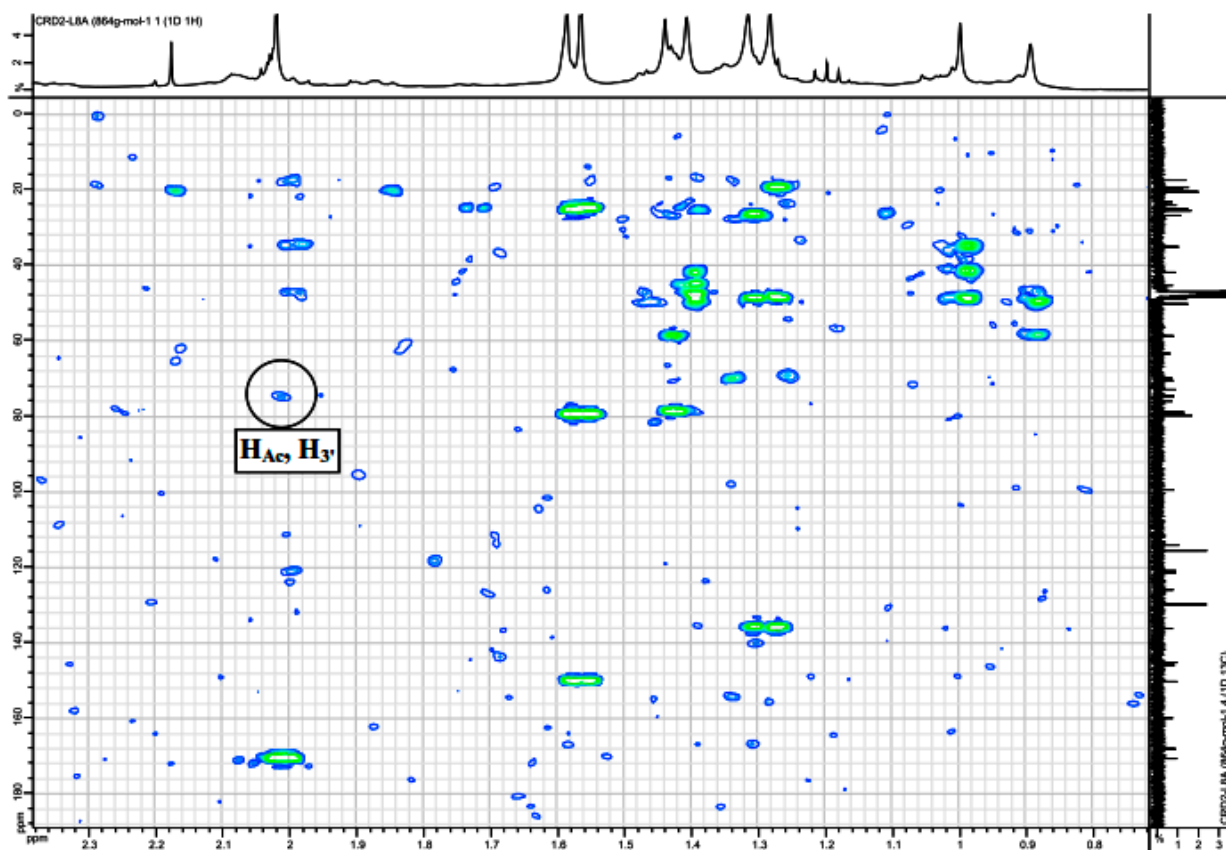

**Figure S17.** HMBC NMR spectrum of 25-*p*-coumaroyl-3'-acetyl-2-*O*- $\beta$ -D-glucocucurbitacin I (**2**) at 400/100 MHz in  $\text{CD}_3\text{OD}$  (Expansion).

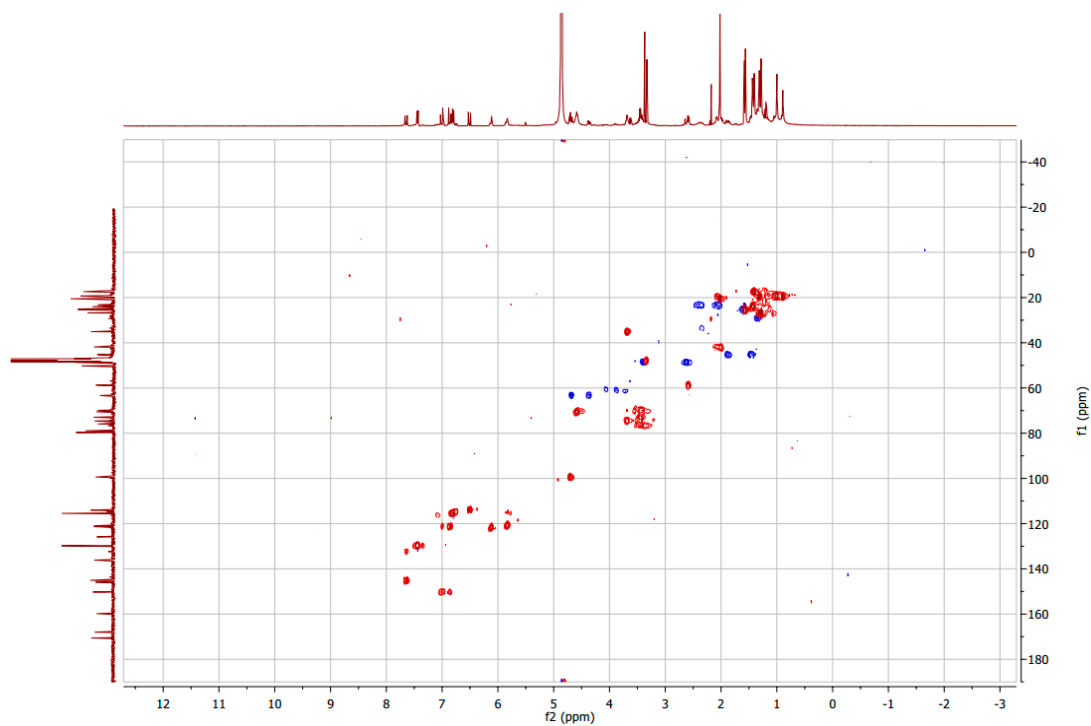

**Figure S18.** HSQC NMR spectrum of 25-*p*-coumaroyl-3'-acetyl-2-*O*- $\beta$ -D-glucocucurbitacin I (**2**) at 400/100 MHz in  $\text{CD}_3\text{OD}$ .

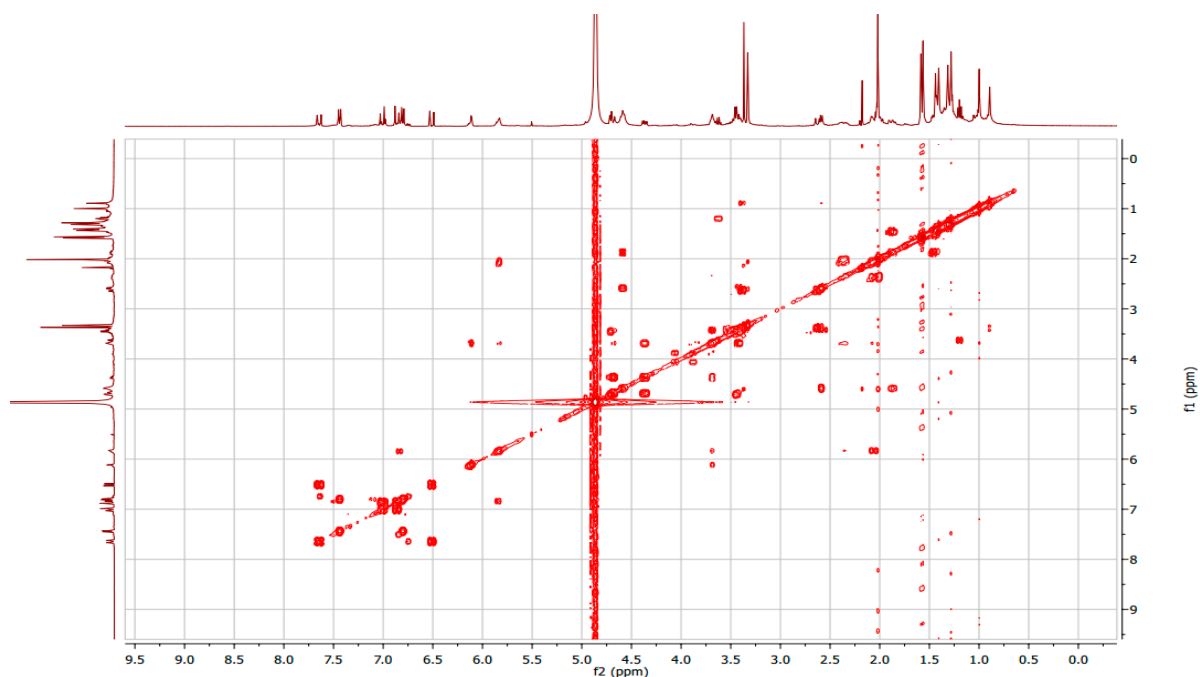

**Figure S19.**  $^1\text{H}$ - $^1\text{H}$  COSY NMR spectrum of 25-*p*-coumaroyl-3'-acetyl-2-*O*- $\beta$ -D-glucocucurbitacin I (**2**) at 400 MHz in  $\text{CD}_3\text{OD}$ .

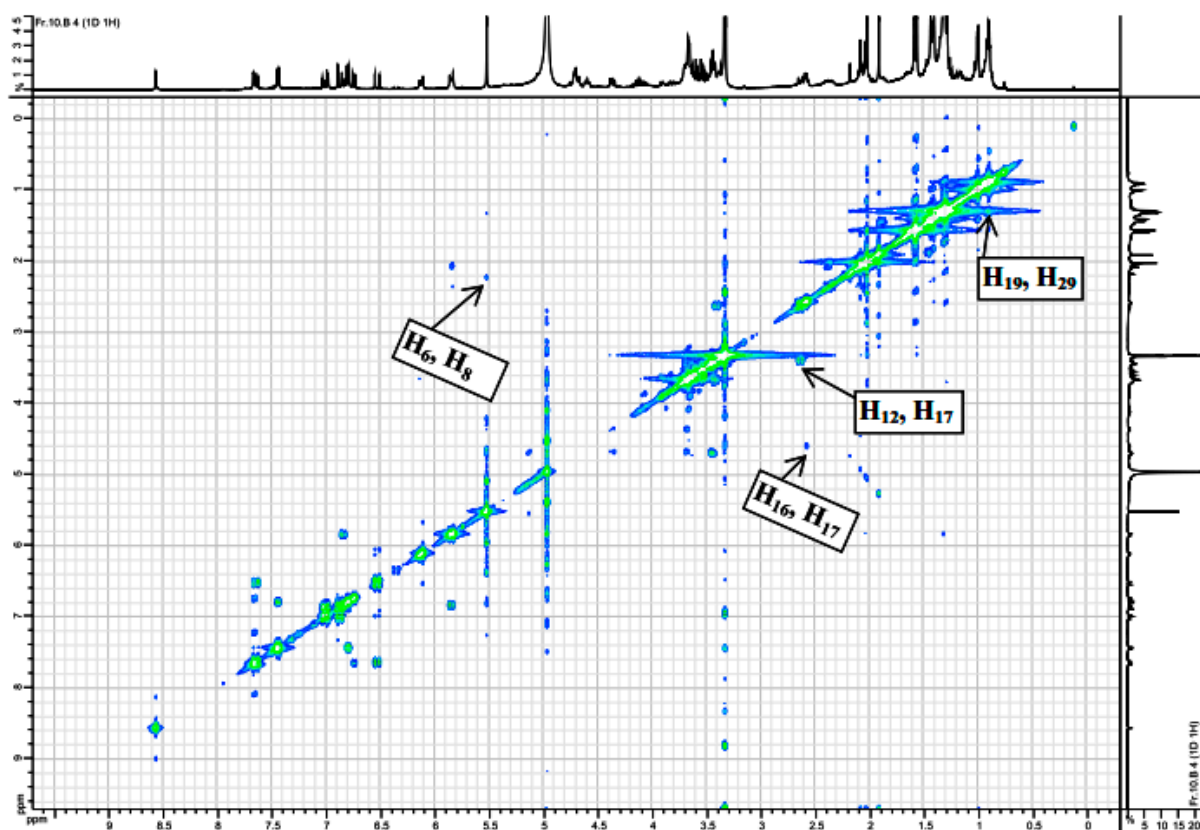

**Figure S20.**  $^1\text{H}$ - $^1\text{H}$  NOESY NMR spectrum of 25-*p*-coumaroyl-3'-acetyl-2-*O*- $\beta$ -D-glucocucurbitacin I (**2**) at 400 MHz in  $\text{CD}_3\text{OD}$ .

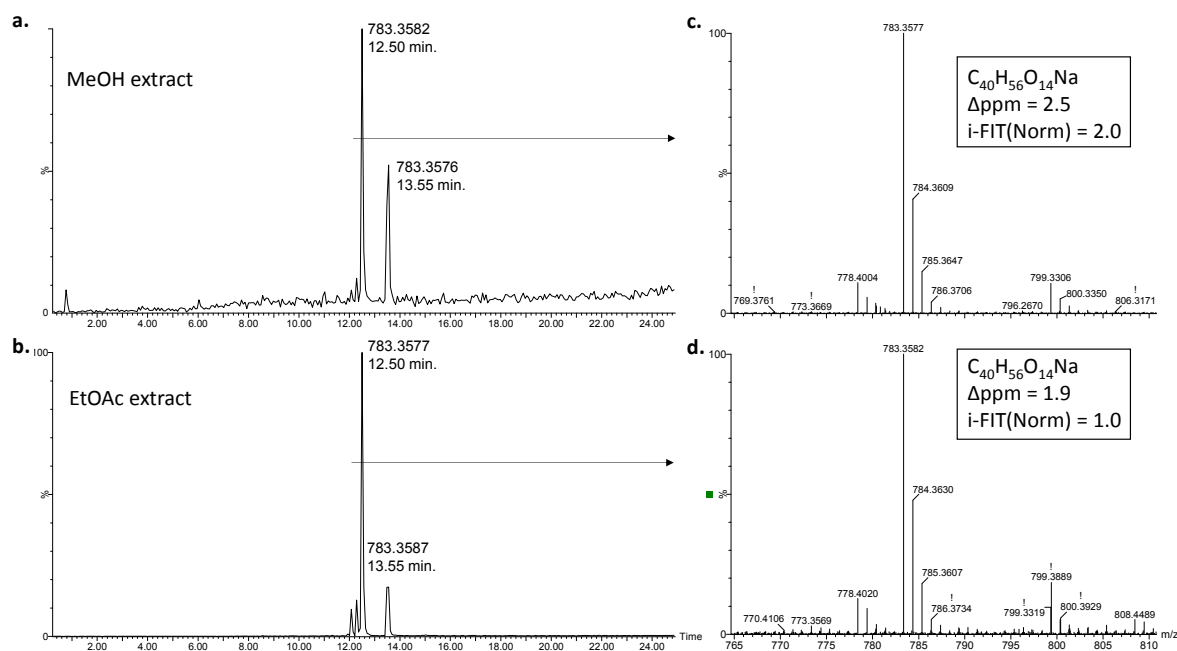

**Figure S21.** Extracted ion chromatograms of ion at  $m/z$  783.35 ( $\pm 0.02$  Da) of UHPLC-TOFMS profiles from crude MeOH (a) and EtOAc (b) extracts showing two isobaric compounds at 12.50 and 13.55 min detected in both extracts. A comparison with purified compound (1) displayed a perfect match with retention time 12.50 min; (c,d): mass spectra of main ions detected at 12.50 min for both extracts. The insets show the results of molecular formula calculation with  $\Delta\text{ppm}$  and isotopic pattern score.

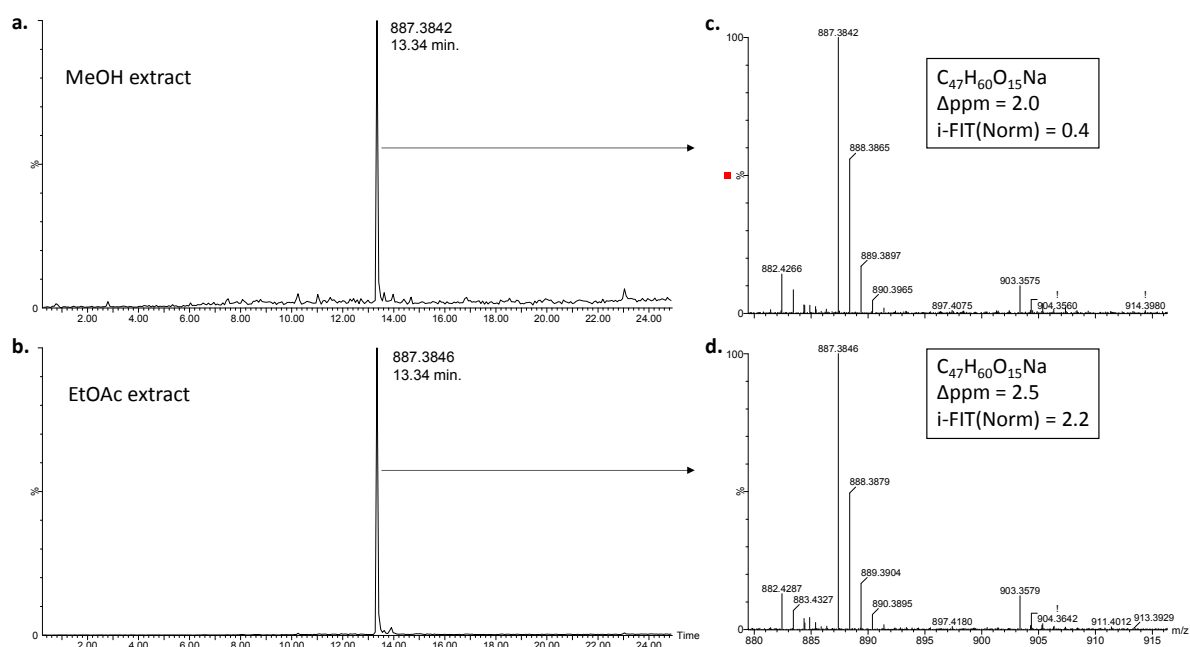

**Figure S22.** Extracted ion chromatogram of ion at  $m/z$  887.39 ( $\pm 0.02$  Da) of UHPLC-TOFMS profiles from crude MeOH (a) and EtOAc (b) extracts. A comparison with purified compound (2) displayed a perfect match with retention time at 13.34 min; (c,d): mass spectra of main ions detected at 13.34 min for both extracts. The insets show the results of molecular formula calculation with  $\Delta\text{ppm}$  and isotopic pattern score.
